# Supplementary material
Source: publisher site journal article supplement (https://www.dovepress.com/article/328991)
Supplement: Supplementary file 1 [file get_supplementary_file.php]

**
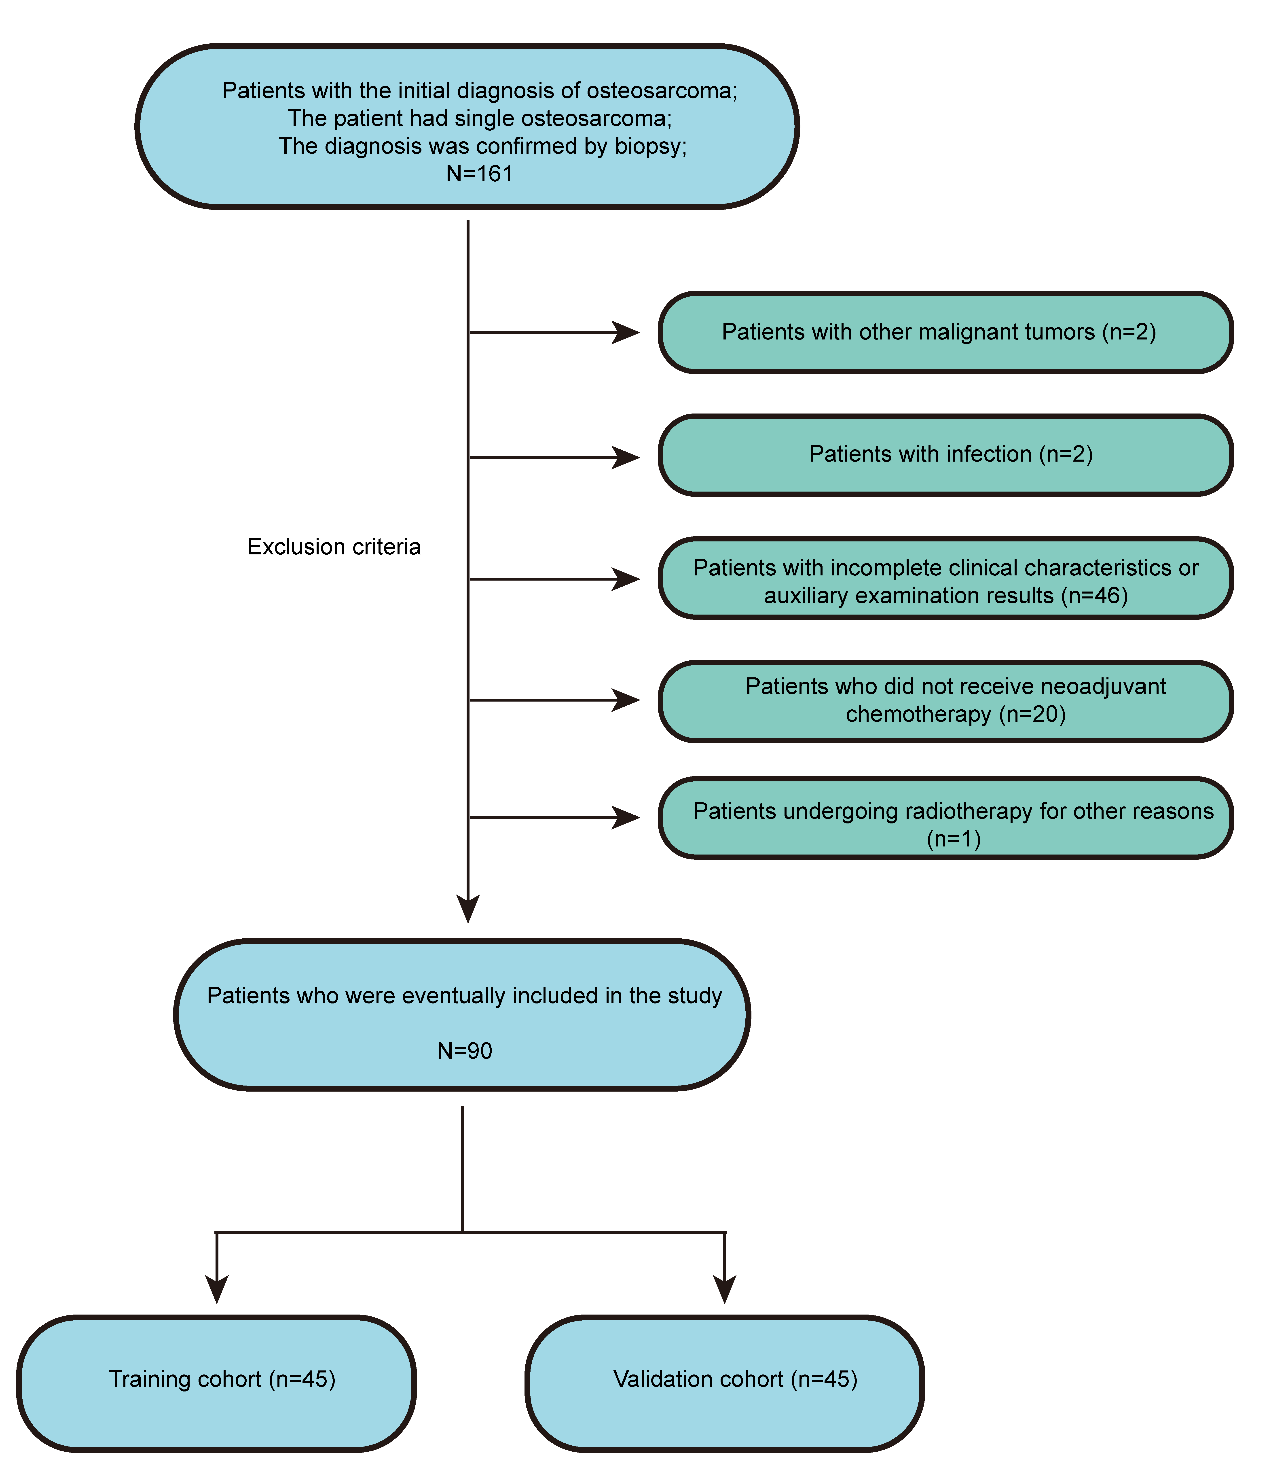
**

**Figure S1** **The process of patient inclusion**. In this study, 90 patients with pathologically confirmed osteosarcoma were included, and they were randomly divided into training cohort (n=45) and validation cohort (n=45).
